# Supplementary material
Source: Elsevier journal article supplement (https://www.sciencedirect.com/science/article/pii/S1885585717302803)
Supplement: mmc2 [file S1885585717302803:mmc2.pdf]

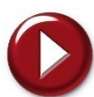

## Material suplementario

---

### ¿Herramientas o juguetes? Un dilema que cumple 20 años sobre los navegadores 3D para la ablación con catéter

---

**Vídeo del material suplementario.** Imágenes de la aurícula izquierda y las venas pulmonares de un navegador electroanatómico (Ensite Precision, Abbott) en proyecciones oblicua anterior derecha (izquierda) e izquierda (derecha), obtenidas durante un procedimiento de ablación de un aleteo auricular izquierdo. Se muestra la movilización de un catéter multielectrodos circular (azul) para la adquisición de un mapa de activación (colores) de alta densidad (puntos amarillos) en pocos minutos. Además, se muestra el extremo distal de catéteres situados en el seno coronario (azul), el septo auricular alto (rojo) y de ablación en la vena pulmonar superior izquierda distal (blanco).
